# Supplementary material for: Genetic Characterization and Insular Habitat Enveloping of Endangered Leaf-Nosed Bat, Hipposideros nicobarulae (Mammalia: Chiroptera) in India: Phylogenetic Inference and Conservation Implication
Source: MDPI journal article supplement (doi:10.3390/genes14030765), 2023-03-21
Supplement: s1 [file s1]

**Table S1.** Primary environmental and topographical variables used for ensemble modelling.

| Sl. No. | Code                 | Variables description                                                                                                                                                                              |
|---------|----------------------|----------------------------------------------------------------------------------------------------------------------------------------------------------------------------------------------------|
|         | <b>Bioclimatic</b>   |                                                                                                                                                                                                    |
| 1.      | bio_1                | Annual Mean Temperature                                                                                                                                                                            |
| 2.      | bio_2                | Mean Diurnal Range (Mean of monthly (max temp - min temp))                                                                                                                                         |
| 3.      | bio_3                | Isothermality (BIO2/BIO7) (* 100)                                                                                                                                                                  |
| 4.      | bio_4                | Temperature Seasonality (standard deviation *100)                                                                                                                                                  |
| 5.      | bio_5                | Max Temperature of Warmest Month                                                                                                                                                                   |
| 6.      | bio_6                | Min Temperature of Coldest Month                                                                                                                                                                   |
| 7.      | bio_7                | Temperature Annual Range (BIO5-BIO6)                                                                                                                                                               |
| 8.      | bio_8                | Mean Temperature of Wettest Quarter                                                                                                                                                                |
| 9.      | bio_9                | Mean Temperature of Driest Quarter                                                                                                                                                                 |
| 10.     | bio_10               | Mean Temperature of Warmest Quarter                                                                                                                                                                |
| 11.     | bio_11               | Mean Temperature of Coldest Quarter                                                                                                                                                                |
| 12.     | bio_12               | Annual Precipitation                                                                                                                                                                               |
| 13.     | bio_13               | Precipitation of Wettest Month                                                                                                                                                                     |
| 14.     | bio_14               | Precipitation of Driest Month                                                                                                                                                                      |
| 15.     | bio_15               | Precipitation Seasonality (Coefficient of Variation)                                                                                                                                               |
| 16.     | bio_16               | Precipitation of Wettest Quarter                                                                                                                                                                   |
| 17.     | bio_17               | Precipitation of Driest Quarter                                                                                                                                                                    |
| 18.     | bio_18               | Precipitation of Warmest Quarter                                                                                                                                                                   |
| 19.     | bio_19               | Precipitation of Coldest Quarter                                                                                                                                                                   |
|         | <b>Topographic</b>   |                                                                                                                                                                                                    |
| 20.     | elevation            | Elevation                                                                                                                                                                                          |
|         | <b>Anthropogenic</b> |                                                                                                                                                                                                    |
|         | <b>LULC</b>          |                                                                                                                                                                                                    |
| 21.     | LULC (Categorical)   | <ul style="list-style-type: none"> <li>• Herbaceous Vegetation</li> <li>• Water Bodies</li> <li>• Cropland</li> <li>• Bare land</li> <li>• Shrubland</li> <li>• Forest</li> <li>• Urban</li> </ul> |
